1 Comparative metabolomics of fruits and leaves in a hyperdiverse lineage  
2 suggests fruits are a key incubator of phytochemical diversification

3  
4 Gerald F. Schneider<sup>1,2\*</sup>, Diego Salazar<sup>3</sup>, Sherry B. Hildreth<sup>1,4</sup>, Richard F. Helm<sup>4</sup>, Susan R.  
5 Whitehead<sup>1</sup>

6 <sup>1</sup> Department of Biological Sciences, Virginia Polytechnic Institute and State University, Blacksburg, VA, USA

7 <sup>2</sup> Department of Biology, Utah State University, Logan, UT, USA

8 <sup>3</sup> Department of Biological Sciences, International Center for Tropical Botany, Florida International University,  
9 Miami, FL, USA

10 <sup>4</sup> Department of Biochemistry, Fralin Life Sciences Institute, Virginia Polytechnic Institute and State  
11 University, Blacksburg, VA, USA.

12 \*Correspondence: [jerry.schneider@usu.edu](mailto:jerry.schneider@usu.edu), +1(818)426-5055

13  
14 Word Count: 6253

- 15 ● Introduction: 1077  
16 ● Materials and Methods: 2968  
17 ● Results: 1156  
18 ● Discussion: 1052

19 Figures: 6, all in color

20 Tables: 4

21 Supporting Information

- 22 ● Figures: 1, in color  
23 ● Tables: 1

24

25

26

27

28

29

30

## 31 Summary

- 32 ● Interactions between plants and leaf herbivores have long been implicated as the  
33 major driver of plant secondary metabolite diversity. However, other plant-animal  
34 interactions, such as those between fruits and frugivores, may also be involved in  
35 phytochemical diversification.
- 36 ● Using 12 species of *Piper*, we conducted untargeted metabolomics and molecular  
37 networking with extracts of fruits and leaves. We evaluated organ-specific secondary  
38 metabolite composition and compared multiple dimensions of phytochemical  
39 diversity across organs, including richness, structural complexity, and variability  
40 across samples at multiple scales within and across species.
- 41 ● Plant organ identity significantly influenced secondary metabolite composition, both  
42 independent of and in interaction with species identity. Leaves and fruit shared a  
43 majority of compounds, but fruits contained more unique compounds and had higher  
44 total estimated chemical richness. While organ-level chemical richness and structural  
45 complexity varied substantially across species, fruit diversity exceeded leaf diversity  
46 in more species than the reverse. Furthermore, the variance in chemical composition  
47 across samples was higher for fruits than leaves. By documenting a broad pattern of  
48 high phytochemical diversity in fruits relative to leaves, this study lays groundwork  
49 for incorporating fruit into a comprehensive and integrative understanding of the  
50 ecological and evolutionary factors shaping secondary metabolite composition at the  
51 whole-plant level.

52 **Key words:** secondary metabolites, chemical diversity, metabolomics, fruit, seed, leaf

## 54 Introduction

55 Phytochemistry plays a key role in mediating the ecological and evolutionary  
56 dynamics of plant interactions (Kessler & Baldwin, 2002; Wittstock & Gershenzon, 2002;  
57 Hartmann, 2007). As functional traits, secondary metabolites can significantly affect plant  
58 fitness by defending plants against antagonists, directly affecting the competitive ability of  
59 neighboring plants, protecting plants from harsh environmental conditions, and attracting and  
60 rewarding mutualists, both above and below ground (Iason *et al.*, 2012). However, research  
61 on secondary metabolites and their role in the ecology and evolution of plants has been  
62 disproportionately focused on vegetative organs, specifically the leaf (e.g. Kursar *et al.*, 2009;  
63 Richards *et al.*, 2015; Volf *et al.*, 2018; Salazar *et al.*, 2018). While secondary metabolites  
64 have numerous demonstrated functions mediating plant-animal interactions surrounding  
65 leaves, they also likely perform a crucial and complex set of functions in reproductive organs.

66 Plant reproductive organs have been a nexus of plant-animal interactions since before  
67 the emergence of angiosperms. However, the ecological role that secondary metabolites play  
68 in the biology of these plant organs has not been deeply explored. Fruits, and the seeds they  
69 contain, provide a direct link to plant fitness and are therefore likely to be under intense

70 selection pressure to attract mutualists and deter antagonists. These complex and contrasting  
71 selective pressures are distinct from those acting on leaves, and may lead to the occurrence of  
72 secondary metabolites not found in other organs. Indeed, given the complex and often  
73 contrasting nature of selective pressures to which fruits and seeds are exposed, fruits and  
74 seeds are likely to serve as evolutionary incubators of novel secondary metabolites, and  
75 disproportionately contribute to the diversity of phytochemical traits. This is especially likely  
76 in systems involving animal-mediated seed dispersal (zoochory), in which plants face the  
77 ecological and physiological challenge of attracting and offering a nutritional reward to  
78 dispersal vectors while also repelling seed predators, pathogens, and non-target frugivores  
79 (Herrera, 1982; Tewksbury, 2002; Whitehead *et al.*, 2016).

80         Secondary metabolites endemic to fruits, and with demonstrated functional  
81 significance in seed dispersal and/or fruit defense, have been shown in several systems,  
82 including iridoid glycosides in honeysuckles (Whitehead & Bowers, 2013a, 2013b),  
83 capsaicinoids in *Capsicum* (Suzuki & Iwai, 1984; Tewksbury & Nabhan, 2001; Tewksbury *et*  
84 *al.*, 2008), and amides and alkenylphenols in *Piper* (Whitehead *et al.*, 2013, 2016; Whitehead  
85 & Bowers, 2014; Maynard *et al.*, 2020). Further, capsaicinoids in *Capsicum* and  
86 alkenylphenols in *Piper* are synthesized only in the fruits of these taxa (Suzuki & Iwai, 1984;  
87 Maynard *et al.*, 2020). Overall, these studies suggest that unique and potentially contrasting  
88 selective pressures on fruits may be an important factor shaping phytochemical  
89 diversification in plants. However, our understanding of the relative importance of  
90 interactions across plant organs in shaping phytochemical diversity is limited by a paucity of  
91 studies that compare chemical composition and metabolomic diversity across plant organs in  
92 an ecological context.

93         Comparative metabolomic studies across plant organs have the potential to greatly  
94 expand our understanding of secondary metabolite function and evolution. Given that  
95 metabolites may be organ-specific, the location in which they are expressed in the plant (and  
96 consequently, the ecological interactions in which they are involved) can provide valuable  
97 insight into both the evolutionary origins and ecological consequences of the vast diversity of  
98 undescribed plant secondary metabolites.

99         Despite the likelihood of distinct selective pressures promoting divergent evolution of  
100 secondary metabolites across plant organs, it is likely that the phytochemical diversity in one  
101 organ may be constrained by physiological or genetic linkages with the phytochemistry of  
102 other organs (Adler *et al.*, 2006, 2012; Kessler & Halitschke, 2009; Keith & Mitchell-Olds,  
103 2019). Physiological constraints may result when a majority of the steps in a secondary

104 metabolite pathway are localized to a particular part of the plant, yielding complete or nearly  
105 complete end products that are then transported to the organs in which they are utilized, e.g.  
106 glucosinolates in the Brassicaceae (Keith & Mitchell-Olds, 2019). Such a pathway has a  
107 limited capacity to generate organ-specific modifications of its end products prior to  
108 transport, and the sink organs may lack the metabolic machinery required for such  
109 modifications. Other secondary metabolites are locally synthesized, but in this case organ-  
110 specific metabolites derived from a shared metabolic pathway may be limited by genetic  
111 linkage, through co-localization of genes responsible for modifications within a metabolic  
112 pathway, e.g. terpene synthase clusters (Falara *et al.*, 2011; Chen *et al.*, 2020; Xu *et al.*,  
113 2020). Certainly, evolutionary processes may overcome these constraints when there are  
114 conflicting selection pressures among organs, as evidenced by the numerous examples above  
115 of compounds occurring only in specific organs. Furthermore, even when fruits and leaves do  
116 share compounds, these compounds may be quantitatively uncorrelated (Cipollini *et al.*,  
117 2004; Whitehead & Bowers, 2013; Berardi *et al.*, 2016). Thus, while all plant species are  
118 biochemically circumscribed to some extent by the biosynthetic pathways acquired through  
119 their evolutionary history, broad evolutionary patterns of such constraints across plant organs  
120 have yet to be elucidated. Comparative metabolomics provide us with the tools to define and  
121 characterize these patterns of constraint in conjunction with patterns of phytochemical  
122 innovation.

123         In this study, we use comparative untargeted metabolomics to explore whether and  
124 how differential selective pressures and constraints across reproductive and vegetative organs  
125 have shaped the diversity and distribution of secondary metabolites in *Piper*, a pantropical  
126 species-rich genus. *Piper* are diverse and dominant members of neotropical lowland forest  
127 understories and are known to contain a rich array of secondary metabolites (Kato & Furlan,  
128 2007; Richards *et al.*, 2015). Their well-studied chemical composition and a long history of  
129 ecological research have made them a model system for understanding phytochemical  
130 diversification and its role in shaping plant interactions and community structure (Dyer &  
131 Palmer, 2004; Richards *et al.*, 2015; Salazar *et al.*, 2016).

132         Our overall objective in this study is to test the hypothesis that fruits can act as  
133 incubators of phytochemical diversification in plants. First, we describe the occurrence  
134 patterns of secondary metabolites across leaves, fruit pulp, and seeds in 12 *Piper* species,  
135 providing baseline data for understanding *Piper* secondary metabolite function. We use  
136 untargeted mass spectrometry-based metabolomics, molecular networking, and in-silico  
137 fragmentation modeling to characterize undescribed metabolites, followed by machine

138 learning and distance-based methods to compare composition across organs and species.  
139 Second, we use these data to test predictions of high relative diversity in fruits derived from  
140 our hypothesis of fruit-driven phytochemical diversification. We compare multiple  
141 dimensions of phytochemical diversity across leaves and fruit organs, including the richness  
142 at multiple scales (alpha and gamma diversity), variability (beta diversity), and structural  
143 complexity of secondary metabolites.

## 144 **Materials and Methods**

### 145 ***Study system***

146 Encompassing over 1,000 species across the Neotropics (Quijano-Abril *et al.*, 2006), the  
147 genus *Piper* is diverse and abundant in forest understories, clearings, and edges (Gentry,  
148 1990; Dyer & Palmer, 2004). *Piper* growth forms range from herbs and vines to shrubs and  
149 small trees (Gentry, 1990; Dyer & Palmer, 2004). Fruits of Neotropical *Piper* are borne on  
150 distinct spike-shaped infructescences that are dispersed primarily by bats of the genus  
151 *Carollia* (Phyllostomidae). Fruit antagonists of *Piper* include insect seed predators, which  
152 have been found to consume up to 87% of seeds (Greig, 1993), and a largely uncharacterized  
153 suite of pathogens, which rapidly attack fruit upon ripening (Thies & Kalko, 2004;  
154 Whitehead & Bowers, 2014; Maynard *et al.*, 2020). Leaves of *Piper* are subject to herbivory  
155 from a broad array of arthropods, including a genus of specialist geometrid moths, *Eois*,  
156 estimated to include over 1,000 species in the Neotropics (Brehm *et al.*, 2016), as well as  
157 other geometrid moths, coleopterans, and orthopterans (Dyer & Palmer, 2004).

### 158 ***Field collections***

159 All field collections took place between 2009 and 2012 at La Selva Biological Station,  
160 Heredia Province, Costa Rica. Samples were collected during a phenology census across 28  
161 species of *Piper* during 2009-10 and opportunistically from 2010-12 when ripe fruits were  
162 available. Ripe fruits were distinguished by a distinct softening and swelling of the fruit along  
163 an infructescence combined with a partial senescence of the infructescence from the branch  
164 (presumably to allow bats to easily remove the entire infructescence in flight). In most *Piper*  
165 species included in this study, one or a few infructescences ripen per day per plant during the  
166 fruiting period, and the vast majority of these are removed on the same night of ripening by  
167 bats (Thies & Kalko, 2004; Maynard *et al.*, 2020). Those that are not removed rapidly  
168 decompose; therefore, we always took care to collect freshly-ripened infructescences. We  
169 chose 12 species for inclusion in this study for which we were able to obtain collections from  
170 at least three individual plants. For each individual, we collected 1-2 ripe infructescences and  
171 the unripe infructescences that were immediately distal to the ripe ones on the same branch.

172 Fruits on a *Piper* branch mature sequentially from the proximal to the distal end of the  
173 branch; thus, these adjacent unripe infructescences were the next closest to maturity on that  
174 branch. Leaves were collected from the same branch. We chose the youngest fully-expanded  
175 leaf that did not have extensive herbivore damage. All samples were transported immediately  
176 to the laboratory (within 2 hours) and frozen at -80°C prior to analysis. Subsequent analyses  
177 involve four sample types: complete leaves, pulp from unripe and ripe infructescences, and  
178 seeds from ripe infructescences.

### 179 ***Chemical extractions***

180 The frozen plant material was freeze-dried (-20° C/ -55 ° C, shelf/condenser), then ground  
181 to a fine powder using a FastPrep-24 homogenizer. Seeds and pericarp were separated prior  
182 to grinding by gently rubbing the dried fruit over fine mesh; the lignified central rachis of the  
183 infructescence was discarded. In unripe fruit, seeds that were not sufficiently developed to be  
184 separated from the pericarp by this method were homogenized with the pericarp. For each  
185 sample, 50 mg of homogenized powder was weighed into a 2 mL Eppendorf tube using a  
186 microbalance. To isolate the broadest possible range of phytochemicals while excluding the  
187 broadest possible range of primary metabolites, extracts were prepared using buffered  
188 acetonitrile and acetone in series. The acetonitrile and acetone extraction solutions were  
189 prepared with an aqueous acetate buffer (44.3 mmol/L ammonium acetate), both at 70:30  
190 solvent: buffer, v/v. The solutions were prepared with Nanopure® water, Fisher HPLC-grade  
191 acetic acid, and Fisher Optima®-grade ammonium acetate, acetonitrile, and acetone. All  
192 containers and instruments coming into contact with the extracts were rinsed with Fisher  
193 Optima®-grade methanol. Each 50 mg sample was extracted twice with 1.5 mL buffered  
194 acetonitrile, then twice more with 1.5 mL buffered acetone (6.0 mL total extraction solution).  
195 During each of these four extractions, the sample was mixed with the extraction solvent for 5  
196 min in a vortexer, and then centrifuged for 5 min at 15870 rcf, after which the supernatant  
197 was removed and added to a 20 mL glass scintillation vial. The supernatant from each of the  
198 four extractions was combined in the same 20 mL vial. The combined extract was dried at  
199 30° C using a nitrogen evaporator until no solvent was visible, then further dried in a  
200 lyophilizer for 12 h (-20° C/ -55 ° C, shelf/condenser) before being transferred to storage at -  
201 80° C until analysis.

### 202 ***Untargeted metabolomics***

203 LC-MS data were collected using an Acquity I-class UPLC coupled to a Waters Synapt  
204 G2-S quadrupole time-of-flight mass spectrometer (Waters). For analysis, dried extracts were  
205 resuspended at 10 mg/mL in 75:25 water: acetonitrile + 0.1 % formic acid, with 1.0 µg/mL

206 *N*-oleoylglycine as an internal standard. The extract was then sonicated for 10 min, after  
207 which a 20  $\mu$ L aliquot was taken and diluted 10-fold with 75:25 water: acetonitrile + 0.1 %  
208 formic acid. The diluted aliquot was then vortexed and centrifuged (10 min, 13,000  $\times$ g) and an  
209 aliquot (180  $\mu$ L) was transferred to an LC-MS vial for analysis. Solvent blanks and  
210 combined, quality-control samples were injected at regular intervals during data collection.  
211 The autosampler temperature was 10°C and the injection volume was 1.5  $\mu$ L. The column  
212 employed was a reverse-phase Acquity BEH C18 (2.1 mm ID x 150 mm, 1.7  $\mu$ m particle  
213 size, Waters) maintained at 35 °C at a flow rate of 0.2 mL/min. Solvent A was water with  
214 0.1% formic acid and solvent B was acetonitrile with 0.1% formic acid (LCMS grade, Fisher  
215 Chemical). Solvent gradient: 0-0.5 min, 90% A; 0.5-1.0 min, 75% A; 1.0-8.0 min, 5% A; 8.0-  
216 10.0 min, held at 5% A; 10.0-11.0 min, 90% A; 11.0-15.0 min, held at 90% A. Mass spectra  
217 and fragmentation spectra were collected simultaneously using Waters' MS<sup>E</sup> in positive-ion  
218 mode, with the following parameters: peak data recorded in centroid mode; 0.185 s MS scan  
219 time; 20-35 V collision energy ramp; argon collision gas; 125° C source temperature; 3 V  
220 capillary voltage; 30 V sample cone voltage; 350° C desolvation temperature; nitrogen  
221 desolvation at 500 L/hr; 10  $\mu$ L/min lockspray flow rate; 0.1 s lockspray scan time; 20 s  
222 lockspray scan frequency; 3 lockspray scans to average; 0.5 Da lockspray mass window; 3 V  
223 lockspray capillary voltage. The lockspray solution was 1 ng/  $\mu$ L leucine enkephalin, and  
224 sodium formate was used to calibrate the mass spectrometer.

225 Alignment, deconvolution, and annotation of molecular and adduct ions were  
226 conducted using the XCMS and CAMERA packages in R statistical software (Smith *et al.*,  
227 2006; Tautenhahn *et al.*, 2008; Benton *et al.*, 2010; Kuhl *et al.*, 2012) with parameters in (R  
228 code repository).

### 229 ***Molecular networking***

230 Molecular networking was used to quantify and visualize the dimensions of the  
231 chemical structural trait space occupied by the secondary metabolites in our study (Aron *et*  
232 *al.*, 2020). This technique employs tandem mass spectrometry to generate fragmentation  
233 spectra for each putative compound. These fragmentation spectra are diagnostic of molecular  
234 structure, and through pairwise comparison they are used to generate a network linking  
235 putative compounds to one another based on structural similarity.

236 In our study, fragmentation spectra data files were aligned, deconvoluted, and  
237 converted to .mgf using MS-DIAL software (v4.10) and were then uploaded to the Global  
238 Natural Products Social Molecular Networking (GNPS) online workflow for molecular  
239 networking and library-based annotation. The following parameters were used for the GNPS

240 workflow METABOLOMICS-SNETS-V2 (v14): 0.02 Da precursor ion mass tolerance; 0.02  
241 Da fragment ion mass tolerance; minimum matched fragment peaks = 6; minimum cluster  
242 size = 3; minimum cosine score for network pairs = 0.7; network TopK = 1000; maximum  
243 connected component size = 0. All mass spectral libraries available through GNPS which  
244 contained data collected in positive ion mode were used for annotation. Library search  
245 parameters were: minimum matched peaks = 6; cosine score threshold = 0.6; maximum  
246 analog mass difference = 100. Workflow options for advanced filtering, advanced GNPS  
247 repository search, and advanced output were not used.

248 For further annotation via *in-silico* modeling, results of the METABOLOMICS-  
249 SNETS-V2 workflow were passed to a second GNPS workflow, Network Annotation  
250 Propagation (NAP\_CCMS v1.2.5). The parameters used for NAP\_CCMS were as follows: all  
251 clusters selected; subselection cosine value = 0.7; first candidates for consensus score = 10;  
252 fusion results used for consensus; accuracy for exact mass candidate search = 15 ppm;  
253 acquisition mode = positive; adduct ion types =  $[M+H]^+$  and  $[M+Na]^+$ ; all structure databases  
254 selected; no custom database or parameter file; compound class not specified; parent mass  
255 selection enabled; maximum number of graphed candidate structures = 10; standard  
256 workflow type.

257 Finally, the outputs from METABOLOMICS-SNETS-V2 and NAP\_CCMS were  
258 combined and exported for visualization using the GNPS workflow MolNetEnhancer (v15).  
259 Network visualization and curation was conducted using Cytoscape software (v3.7.2). Parent  
260 masses of features in the molecular network were curated based on the XCMS-CAMERA  
261 output described above, with primary metabolites and artefactual or pseudoreplicated features  
262 removed from the network and subsequent analyses. Features in the molecular network were  
263 annotated to the level of chemical class, e.g. flavonoid or prenol lipid, based on ClassyFire  
264 chemical taxonomy as applied by MolNetEnhancer. The list of annotated molecular features  
265 returned by XCMS-CAMERA processing was used to compare overall phytochemical  
266 composition across organs and species.

267 Unfragmented ions collected during single-mass-spectrometry and subsequently  
268 aligned, deconvoluted, and annotated, as described above, were used to compare overall  
269 phytochemical composition across organs and species. Ion abundance data were transformed  
270 to presence/absence data using the peak recognition parameters in XCMS (R code  
271 repository). Ion presence/absence was used for analyses rather than relative ion abundance  
272 for two reasons: 1) our sample size affords limited capacity to account for variation in  
273 abundance within a given organ of a given species, and 2) the scale of variation in ion



274 abundance is likely to differ widely across the structurally diverse compounds in *Piper* due to  
275 variation in ionization efficiency (Cech & Enke, 2001).

### 276 ***Comparisons of phytochemical composition across organs and species***

277 To compare metabolome-level patterns of phytochemical composition across organs  
278 and species, we conducted two separate analyses of the multivariate sample composition,  
279 focused first on compound occurrences (presence/absence data) and second on the structural  
280 composition of samples. We focused on the occurrence and structure of each molecular  
281 feature and omitted information on relative abundances due to the infeasibility of accounting  
282 for variation in ionization efficiency across hundreds of uncharacterized compounds. First, to  
283 visualize differences in patterns of compound occurrence across samples, we used non-metric  
284 multidimensional scaling (NMDS) based on the Sørensen dissimilarity index (binary Bray-  
285 Curtis). We then tested for effects of organ, species, and their interaction on compound  
286 composition using PERMANOVA, implemented with the ‘adonis2’ function in the R  
287 package ‘vegan’. The individual plant identity was included in these analyses as a ‘strata’  
288 (i.e. random effect), and we used 999 permutations (note that this means the minimum  
289 possible  $P$ -value is  $P = 0.001$ , indicating that the observed differences in sample composition  
290 could not be replicated in any of the 999 permutations). To further understand specific  
291 differences among the four organ types, we followed this analysis with post-hoc pairwise  
292 PERMANOVAs for all possible combinations of organ types, correcting for multiple  
293 comparisons using the ‘pairwise.adonis2’ function (Martinez Arbizu, 2020). In addition,  
294 based on strongly supported interactions between organ and species (see results), we also  
295 divided the data by species and tested for the effects of organ on compound composition for  
296 each species individually. All analyses were conducted using the ‘vegan’ package in R  
297 (Oksanen *et al.*, 2019).

298 In addition to our analysis of compound occurrence, we also examined how the  
299 structural composition of samples was affected by organ, species, and their interaction. To  
300 account for structural features, we generated a multivariate structural dissimilarity index that  
301 was a modification of Sedio *et al.*’s (2017) Chemical Structural and Compositional Similarity  
302 (CSCS) index, which quantifies the pairwise similarity of samples by calculating the  
303 maximum cosine similarity of the aligned MS-MS ion fragmentation spectra for each inter-  
304 sample pair of molecular features. We modified this index by representing ion abundance as a  
305 binary term and expressing the index in terms of dissimilarity (1-CSCS). The structural  
306 dissimilarity matrix was then used as the basis for NMDS and PERMANOVAs as above that  
307 examined the effects of organ, species, and their interaction on structural composition.

## 308 ***Machine learning***

309 To identify molecular features that distinguished different organs, we used random  
310 forest analysis via the “randomForest” and “Boruta” packages for R statistical software (Liaw  
311 & Wiener, 2002; Kursa & Rudnicki, 2010). All molecular features distinguished in XCMS-  
312 CAMERA processing were used as variables in these analyses. The random forest analysis  
313 used a decision tree model to assign samples to our four organ groups (Breiman, 2001; 2002).  
314 In the process, the analysis ranked molecular feature variables according to their importance  
315 in the model’s group assignments. Boruta analysis complemented the bottom-up random  
316 forest analysis by applying a top-down search for molecular features that were important in  
317 informing group assignments. This is accomplished by comparing the features’ importance  
318 with importance achievable at random, using “shadow” variables which are generated by  
319 permuting the original variables (Kursa & Rudnicki, 2010).

## 320 ***Comparisons of chemical diversity across organs***

321 Phytochemical diversity is a multifarious concept that includes the number of  
322 compounds (richness), their relative abundances (evenness), their structural complexity, and  
323 their variation in space and time (Wetzel & Whitehead, 2020). Considering the challenges  
324 associated with estimating abundances in untargeted LC-MS-MS data, we focus here on  
325 richness and structural complexity, both of which were examined at multiple scales within  
326 and across species. For each organ type, we define gamma diversity as the total diversity  
327 observed across all samples, alpha diversity as the average diversity within a single sample  
328 from one organ from one *Piper* individual, and beta-diversity as the variation (both intra- and  
329 inter-specific) across samples.

330 *Gamma diversity.* To compare the gamma diversity (total number of compounds detected  
331 across all species) of different organs, we used a rarefaction analysis analogous to those  
332 commonly used to assess species diversity (Gotelli & Colwell, 2011) with compounds as  
333 “species” as in Wetzel & Whitehead (2020). This allowed us to: 1) explicitly visualize the  
334 relationship between chemical diversity and sampling scale across different organs (i.e. alpha,  
335 beta, and gamma diversity), and 2) estimate the total compound richness in each organ type.  
336 Because our individual samples were not independent (we collected three samples per species  
337 for 12 species), we used a constrained rarefaction that is similar conceptually to spatially-  
338 constrained rarefaction (Chiarucci *et al.*, 2009). Briefly, samples were added to bootstrapped  
339 accumulation curves in a semi-random manner in which samples from the same species were  
340 grouped. For each iteration, a random sample was chosen as a starting point, then other  
341 samples from that species were added in random order prior to choosing another sample at

342 random, following with all other samples from that species, and so on until all species were  
343 included. We estimated total species richness from these curves using the ‘fitspecaccum’  
344 function in ‘vegan’ based on an asymptotic regression model. Accumulation curves and fits  
345 were averaged across 5000 bootstrapped samples with random starting points.

346 *Alpha diversity.* To compare the average compound richness in a sample (i.e. alpha diversity)  
347 across organs, we used a linear mixed model with organ, species, and their interaction as  
348 fixed effects and plant identity as a random effect. For hypothesis testing, we compared the  
349 full model to simplified versions with fixed effects terms deleted using likelihood ratio tests.  
350 Based on a strong interaction between organ and species (see results), we further divided the  
351 data by species and examined differences in richness among organs for each species  
352 separately.

353 *Structural complexity.* To compare structural complexity across organ types, we first  
354 calculated an index of structural complexity for each sample that was modified from the  
355 CSCS index described in Sedio *et al.* (2017) to include only presence/absence data. This  
356 within-sample CSCS represents the mean pairwise similarity among all individual molecular  
357 features detected in a sample. We used the inverse of this similarity index (1-CSCS) as a  
358 measure of overall structural complexity present in a sample. To examine how structural  
359 complexity varied across organs and species, we used a linear mixed model with species,  
360 organ, and their interaction as fixed effects and plant identity as a random effect. Hypothesis  
361 testing was conducted as described above using likelihood ratio tests. Based on strong  
362 interactions between organ and species (see results), we examined differences among organs  
363 separately for each *Piper* species.

364 *Beta diversity.* We examined differences in beta-diversity (i.e. sample-to-sample variance in  
365 composition) across organs in two ways, focusing first on variation in compound occurrences  
366 (presence/absence) and second on structural features. These analyses were based on the same  
367 distance matrices described above that we used to assess overall differences in composition  
368 across samples, but instead focused on variance (i.e. dispersion) among samples. This was  
369 assessed using the function ‘betadisper’ in the R package ‘vegan’ to compare the dispersion  
370 around the group centroid across the four organ types. The ‘betadisper’ function calculated  
371 the distances from each sample to the group centroid, and statistical support for differences in  
372 dispersion across organs was assessed using a permutation test (N = 999 permutations)  
373 followed by a post-hoc Tukey HSD test to assess pairwise differences among individual  
374 organs. Because this analysis focused on sample-to-sample variance and our dataset included  
375 multi-level sampling (multiple species and multiple individuals within species), significant

376 differences in beta diversity across organs could be due to both intraspecific and interspecific  
377 variance among samples. Thus, we followed this analysis with a set of PERMANOVAs,  
378 conducted separately for each organ type, with *Piper* species as an explanatory factor. This  
379 analysis allowed us to test if *Piper* species explained a significant portion of the variation in  
380 composition within an organ, and partitioned sample-to-sample variance within an organ type  
381 according to the percent of variance explained by species and the percent explained by  
382 differences among individuals within species (i.e. the residual variance).

## 383 **Results**

### 384 ***Untargeted metabolomics and molecular networking reveal high chemical diversity and*** 385 ***many compounds unique to fruits***

386 Alignment, deconvolution, and annotation of molecular and adduct ions via XCMS  
387 and CAMERA yielded 1,311 unique molecular features across all species and organs. It is  
388 important to note that, like all other metabolomic approaches, our analytical approach is  
389 likely to overestimate the true number of individual chemical compounds present in our  
390 samples. The combination of XCMS-CAMERA followed by manual curation unfortunately  
391 cannot condense all features (m/z and retention time pairs) into individual compounds. In-  
392 source fragmentation, ion clusters, centroid peak splitting of highly abundant ions, and  
393 centroid merging of ions near the noise level can all contribute to expanding the dataset  
394 beyond individual compounds. The 1,311 features described in this work thus overestimates  
395 the number of individual molecular species, though to a lesser extent than in uncurated  
396 datasets. Nevertheless, this overestimation is likely to represent a small fraction of the total  
397 chemical diversity captured in our analysis. Furthermore, this overestimation is also likely to  
398 be of equal magnitude across all species and organs and therefore, will not have a significant  
399 impact on the general conclusions of our study. Regarding terminology, these 1,311 features  
400 meet or exceed the level of curation beyond which features have, for clarity, been described  
401 as “compounds” in the chemical ecology literature (e.g.: Sedio *et al.*, 2017; Christian *et al.*,  
402 2020; Ricigliano *et al.*, 2020). Thus, for the sake of consistency and clarity, we refer to our  
403 curated features as compounds.

404 Tandem mass spectrometry yielded fragmentation spectra for 706 of these compounds  
405 (Table 1, Fig. 1). Library- and *in silico*-based classification of fragmentation spectra and  
406 parent ions via GNPS resulted in annotation at the level of “class” *sensu* ClassyFire chemical  
407 taxonomy for 527 compounds in 23 classes (Table 1, Fig. 1).

**Table 1:** Summary of GNPS molecular network annotations. Compound richness indicates the number of putative compounds, for which fragmentation spectra were obtained, that fall under the given category. Chemical classes are per ClassyFire chemical taxonomy. A compound was labeled as fruit or leaf-specific if it was detected only in that organ within the 12 focal *Piper* species. Asterisks indicate organ-specific compound richness exhibiting  $P < 0.05$  (binomial test with probability = 0.5 of occurrence in fruit or leaf;  $n$  = number of organ-specific compounds in chemical class).

| <b>Chemical Class</b>               | <b>Examples of class known from <i>Piper</i> spp.</b>               | <b>Total Compound Richness</b> | <b>Fruit-specific Compound Richness</b> | <b>Leaf-specific Compound Richness</b> |
|-------------------------------------|---------------------------------------------------------------------|--------------------------------|-----------------------------------------|----------------------------------------|
| Benzene and substituted derivatives | Cyanogenic benzoates, Non-prenylated benzoic acids                  | 75                             | 5                                       | 0                                      |
| Carboxylic acids and derivatives    | Amides, Chromenes, Kavalactones                                     | 122                            | 25*                                     | 1                                      |
| Flavonoids                          | Flavonoids                                                          | 104                            | 3                                       | 0                                      |
| Organo-oxygen compounds             | Oxygenated or glycosidic derivatives of other classes               | 65                             | 5                                       | 0                                      |
| Other                               | Amides, Chalcones, Chromenes, Imides                                | 37                             | 4                                       | 0                                      |
| Prenol lipids                       | Chalcones, Prenylated benzoic acids, Neryl catechol diols, Terpenes | 124                            | 6*                                      | 0                                      |
| Unknown                             |                                                                     | 179                            | 14*                                     | 1                                      |
| Total                               |                                                                     | 706                            | 62*                                     | 2                                      |

A

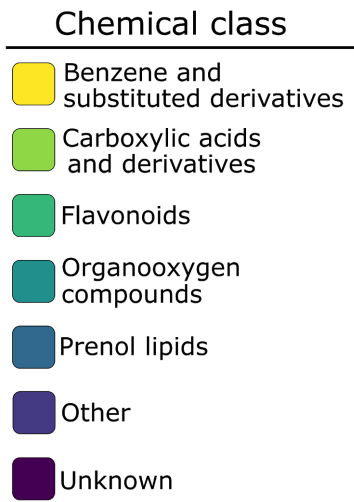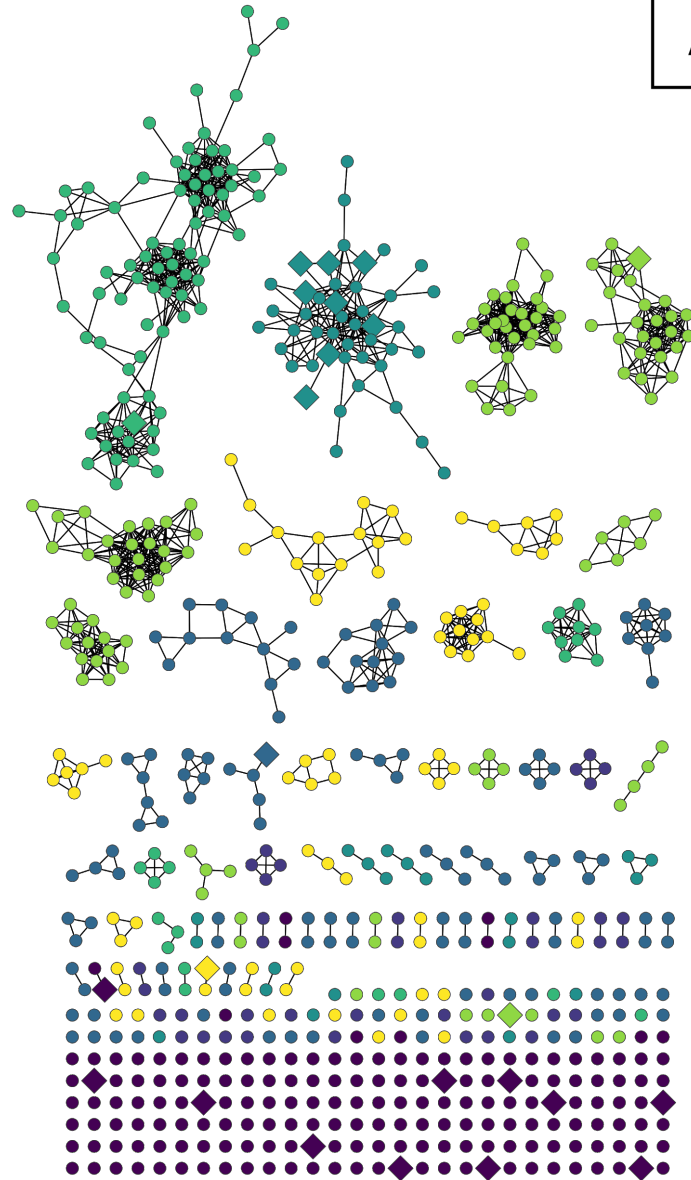

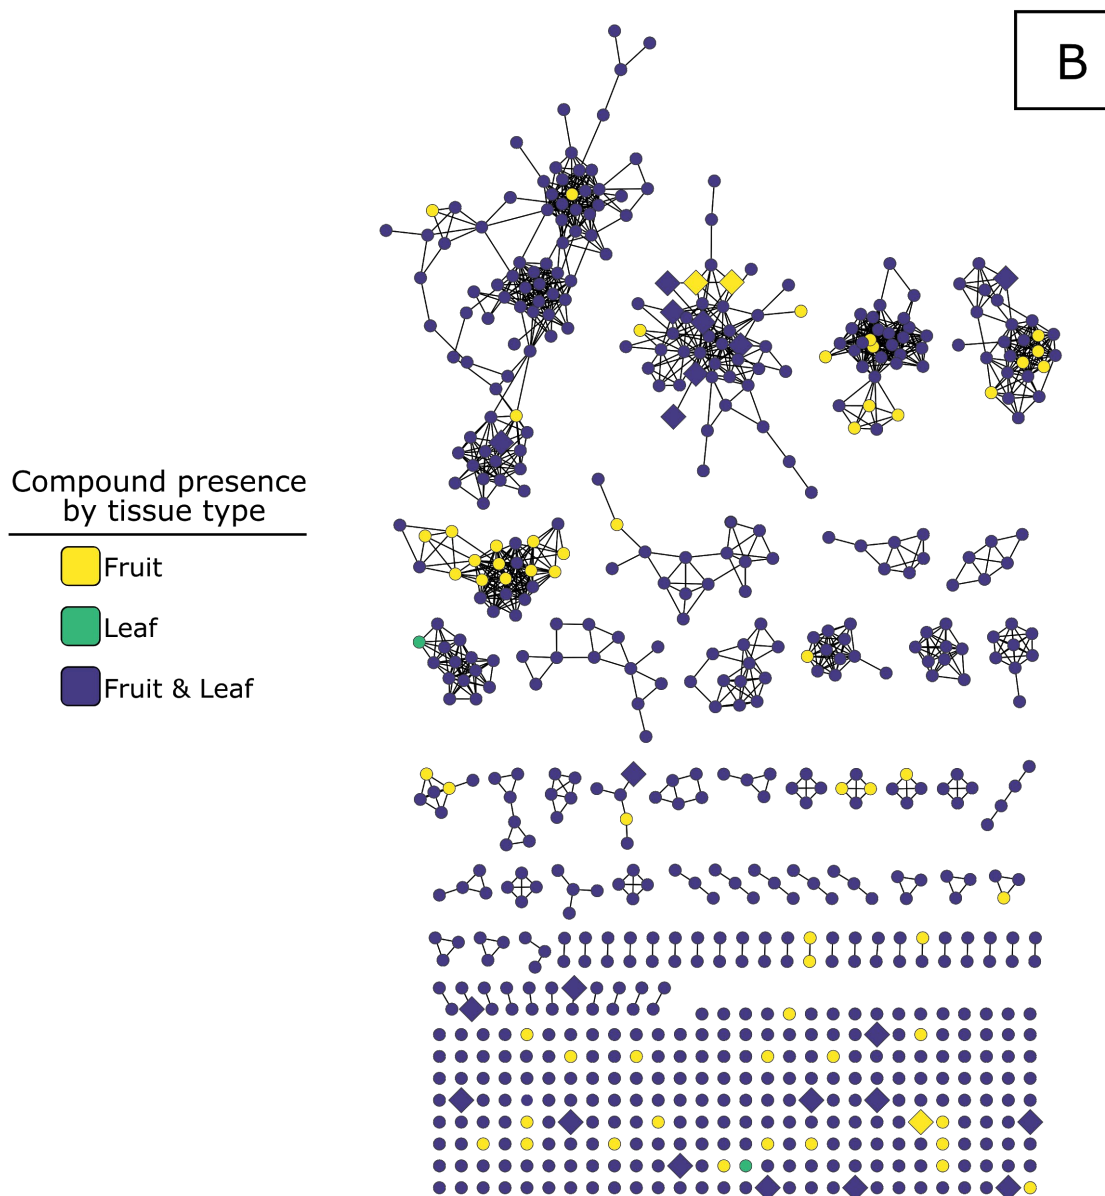

410

411 **Figure 1:** Molecular network of 706 compounds from 12 *Piper* species color-coded by

412 ClassyFire chemical classification annotation (A) or by organ-level occurrence across

413 the 12 species (B). Node and edge arrangement and compound annotation are as

414 described in “Molecular Networking” methods. Enlarged, diamond-shaped nodes

415 represent compounds identified by the Boruta analysis as important for distinguishing

416 among organs. In B, compounds are coded as occurring in “fruit” if they occur in one

417 or more of the three sample types (unripe pulp, ripe pulp, or seeds).

418

419

420

421

422 ***Phytochemical composition differs across organs and species***

423         The multivariate patterns of phytochemical occurrence were strongly affected by  
424 organ, species, and their interaction (organ:  $F_{3,95} = 24.19$ ,  $P = 0.001$ ; species:  $F_{11,95} = 27.65$ ,  $P$   
425  $= 0.001$ ; organ x species:  $F_{33,95} = 1.99$ ,  $P = 0.001$ ; Figure 2A). Pairwise comparisons among  
426 organs indicated strong differences among all organs ( $P = 0.001$  for all comparisons).  
427 Further examination of differences among organs for each of the 12 *Piper* species  
428 individually also revealed strong effects of organ in all cases (Table 2). Similarly, when we  
429 assessed factors influencing the multivariate patterns of structural composition across  
430 samples, we found a strong effect of organ, species, and their interaction (organ:  $F_{3,95} =$   
431  $17.34$ ,  $P = 0.001$ ; species:  $F_{11,96} = 21.28$ ,  $P = 0.001$ ; organ x species:  $F_{33,96} = 2.31$ ,  $P = 0.001$ ;  
432 Figure 2B), significant differences among organs in all pairwise comparisons ( $P = 0.001$  for  
433 all comparisons), and differences among organs for each individual species (Table 2).



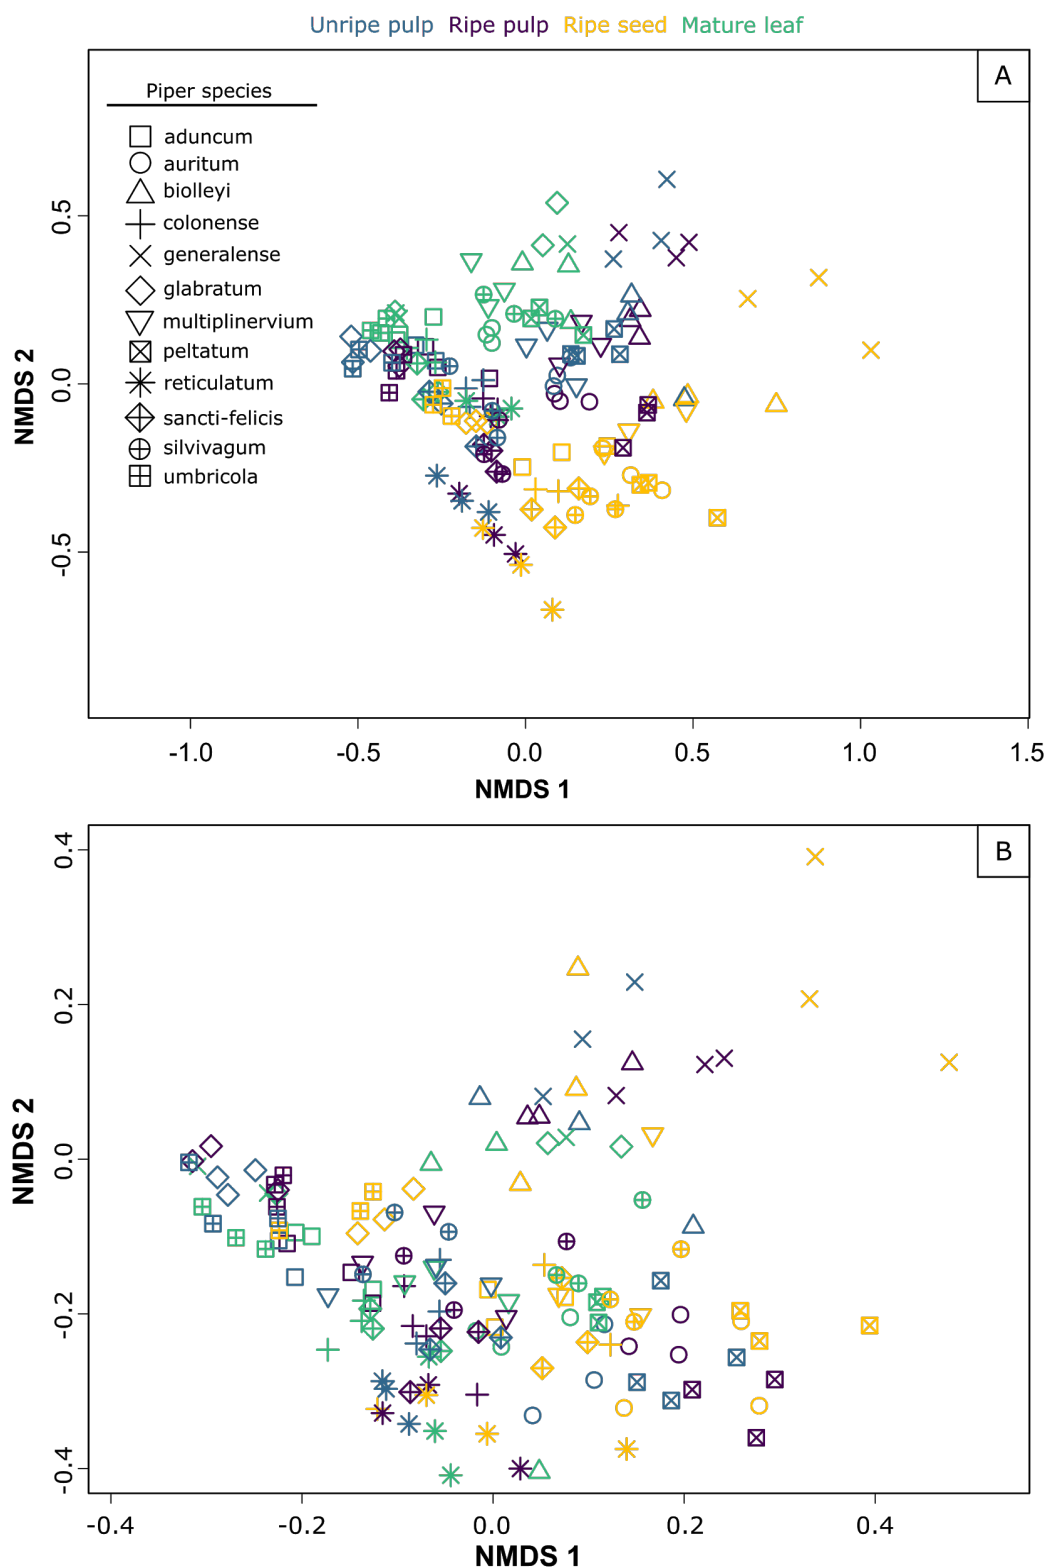

434

435

436 **Figure 2:** NMDS plots showing the effects of organ and species on two aspects of

437 multivariate chemical composition across samples: (A) compound occurrences

438 (presence/absence) and (B) structural composition.

439

**Table 2:** Results from PERMANOVAs, conducted separately for each species, testing the effects of organ type (leaves, seed, unripe pulp, or ripe pulp) on two aspects of phytochemical composition: compound occurrences and structural composition

| <i>Piper species</i> | Compound Occurrence      |          | Structural Composition   |          |
|----------------------|--------------------------|----------|--------------------------|----------|
|                      | <i>F</i> <sub>3,11</sub> | <i>P</i> | <i>F</i> <sub>3,11</sub> | <i>P</i> |
| aduncum              | 3.07                     | 0.001    | 3.07                     | 0.001    |
| auritum              | 3.51                     | 0.002    | 3.51                     | 0.002    |
| biolleyi             | 2.19                     | 0.009    | 2.19                     | 0.009    |
| colonense            | 4.39                     | 0.001    | 4.39                     | 0.001    |
| generalense          | 4.11                     | 0.001    | 4.11                     | 0.002    |
| glabrescens          | 4.18                     | 0.002    | 4.18                     | 0.001    |
| multiplinervum       | 3.45                     | 0.001    | 3.45                     | 0.001    |
| peltatum             | 4.50                     | 0.001    | 4.50                     | 0.001    |
| reticulatum          | 5.38                     | 0.001    | 5.38                     | 0.002    |
| sancti-felicis       | 3.67                     | 0.001    | 3.67                     | 0.001    |
| silvivagum           | 5.19                     | 0.001    | 5.19                     | 0.001    |
| umbricola            | 2.89                     | 0.002    | 2.89                     | 0.001    |

440

441

442

443

444

445 ***Machine learning, informed by numerous compounds from diverse chemical classes in***  
446 ***each organ, accurately distinguishes between reproductive and vegetative organs***

447 The random forest decision tree model used 2000 trees with 36 variables at each split.  
448 Our analysis showed an overall out-of-bag (OOB) mean error rate of 11.72% across the four  
449 organ groups. In other words, using secondary metabolites alone, the algorithm was able to  
450 predict if a sample was from a leaf, ripe fruit, unripe fruit, or seed approximately 9 times out  
451 of every 10 samples. Examining the error rate of each organ group, it was apparent that  
452 correctly assigning pulp samples to the correct ripeness stage was the main source of OOB  
453 error, with error rates of 27.78% and 18.92% for unripe and ripe pulp respectively. Leaves  
454 and ripe seeds both exhibited zero OOB error. Boruta analysis, designed to both identify  
455 important classification features and assess their relative contribution to the final  
456 classification performance, identified 23 features exhibiting a significantly higher variable  
457 importance score (VIS) than shadow variables. These 23 features are detailed in Table S1.

458 **Comparisons of chemical diversity across organs**

459 ***Gamma diversity***

460 Overall, we detected 1,311 compounds across all organ types. The large majority of  
461 these compounds (1,126) were shared across all organs (Fig. 3A). Of those compounds that  
462 were organ-specific, there were 92 compounds that were found only in fruits (unripe pulp,  
463 ripe pulp, and/or seeds) but never in leaves, and four compounds were found only in leaves  
464 but never in fruits. There were also 76 compounds that were shared between fruit pulp  
465 (unripe and/or ripe) and leaves, but never detected in seeds. Rarefaction analysis showed that  
466 the estimated total gamma diversity (total number of compounds across all 12 species of  
467 *Piper*) was highest in unripe and ripe fruit pulp, intermediate in seeds, and lowest in leaves  
468 (Fig. 3B, Table 3).

469

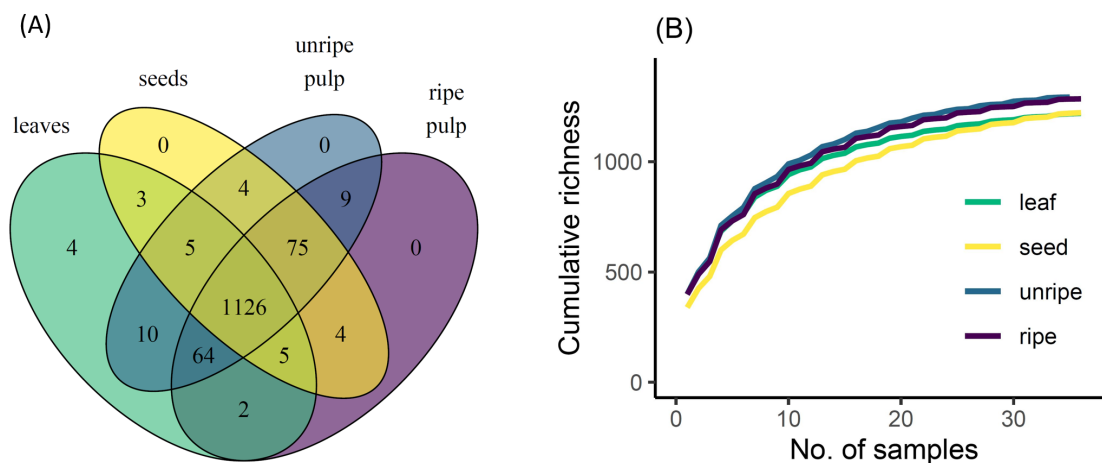

470

471

472 **Figure 3:** Chemical gamma diversity parsed by organ type. A Venn diagram (A) shows the  
 473 total number of compounds detected across all samples that were unique and shared across  
 474 organ type. The rarefaction curve (B) shows how compound richness accumulates with  
 475 sampling scale in each organ type. Curves represent an average across 5000 bootstrapped  
 476 accumulation curves with random starting points. Because samples from the same species  
 477 were not independent, the rarefaction was constrained by species such that samples from the  
 478 same species were always added in sequence.

479

**Table 3:** Rarefaction results showing total estimated richness for each organ across all 12 Piper species sampled

| Organ       | Estimated Richness | SE  | 95% CI high | 95% CI low |
|-------------|--------------------|-----|-------------|------------|
| leaf        | 1226               | 1.5 | 1229.3      | 1223.5     |
| seed        | 1276               | 3.0 | 1282.0      | 1270.1     |
| unripe pulp | 1312               | 2.0 | 1315.8      | 1307.9     |
| ripe pulp   | 1311               | 2.7 | 1316.5      | 1306.1     |

480

481 *Alpha diversity*

482 In our analysis of average differences in compound richness across organs and  
483 species, we found a strong interaction between organ and species ( $X^2 = 128.99$ ,  $P < 0.0001$ )  
484 and further examined differences among organs for each species separately. Organs often  
485 showed clear differences in average richness, but the patterns were highly variable across  
486 species (Fig. 4). In three species (*P. glabrescens*, *P. reticulatum*, and *P. silvivagum*), pulp  
487 and/or seeds had higher compound richness than leaves. However, in two species (*P.*  
488 *multiplinervum* and *P. generalense*) leaves had higher compound richness than all other fruit  
489 organs.

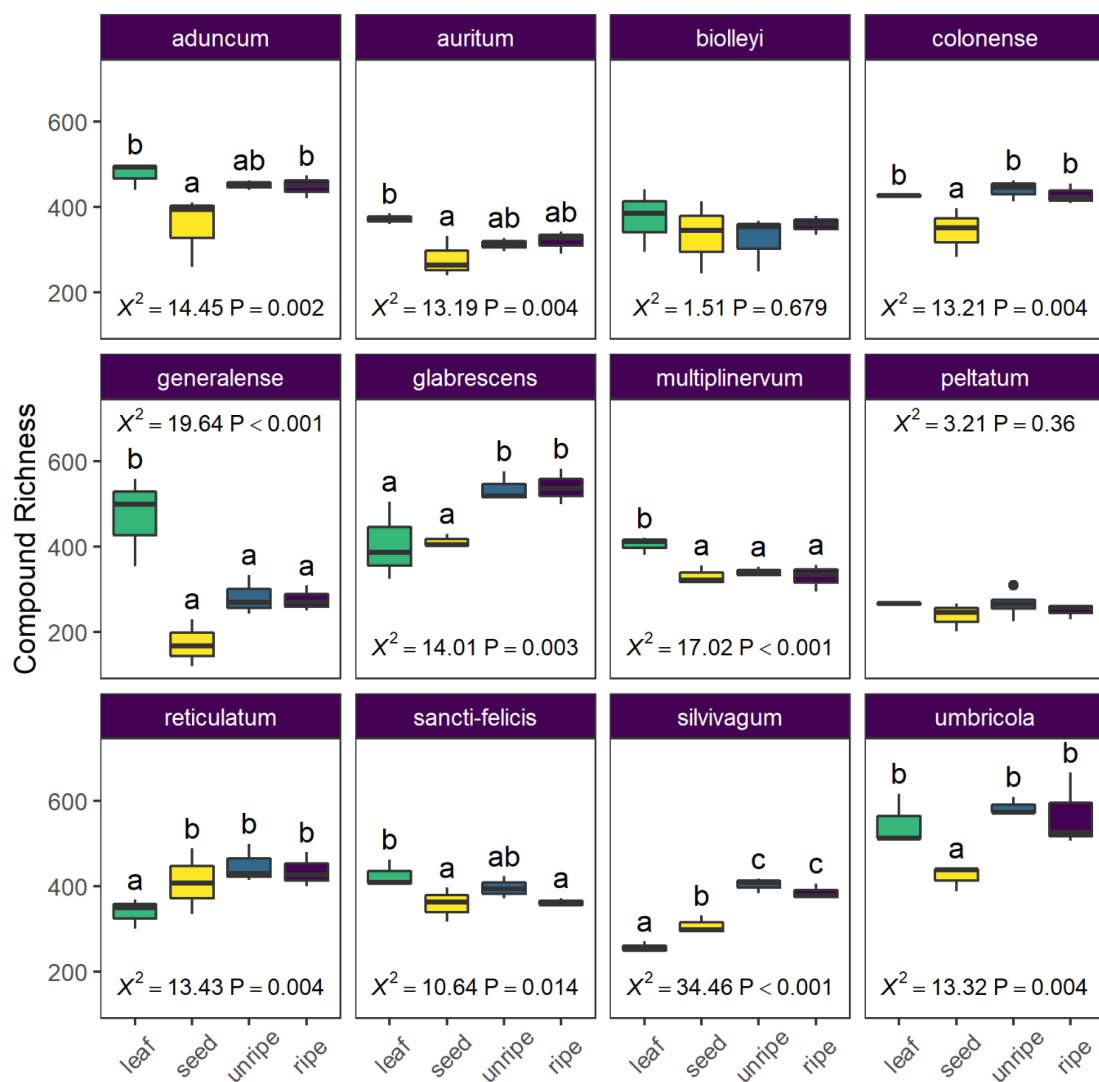

490

491 **Figure 4:** Average chemical richness differs across species and organ type (leaf, seed, unripe  
492 pulp, and ripe pulp). Letters indicate results of pairwise Tukey post-hoc comparisons of

493 organs within each species, with non-shared letters indicating a significant difference at  $P <$   
 494 0.05. Each species plot includes  $X^2$  and  $P$ -values from species-level LMMs.

495

496 **Structural complexity**

497 In our analysis of average differences in structural complexity across organs and  
 498 species, we found a strong interaction between organ and species ( $X^2 = 131.13$ ,  $P < 0.0001$ )  
 499 and further examined differences among organs for each species separately. For seven of  
 500 twelve species, organs showed differences in average structural complexity, but the patterns  
 501 were variable across species (Fig. 5). In two species (*P. glabrescens* and *P. silvivagum*), one  
 502 or more fruit organs had higher complexity than leaves. In another species (*P. generalense*),  
 503 leaves had higher complexity than all other fruit organs. Often, seeds had the lowest  
 504 structural complexity, or at least lower structural complexity than unripe or ripe fruit pulp  
 505 (Fig. 5).

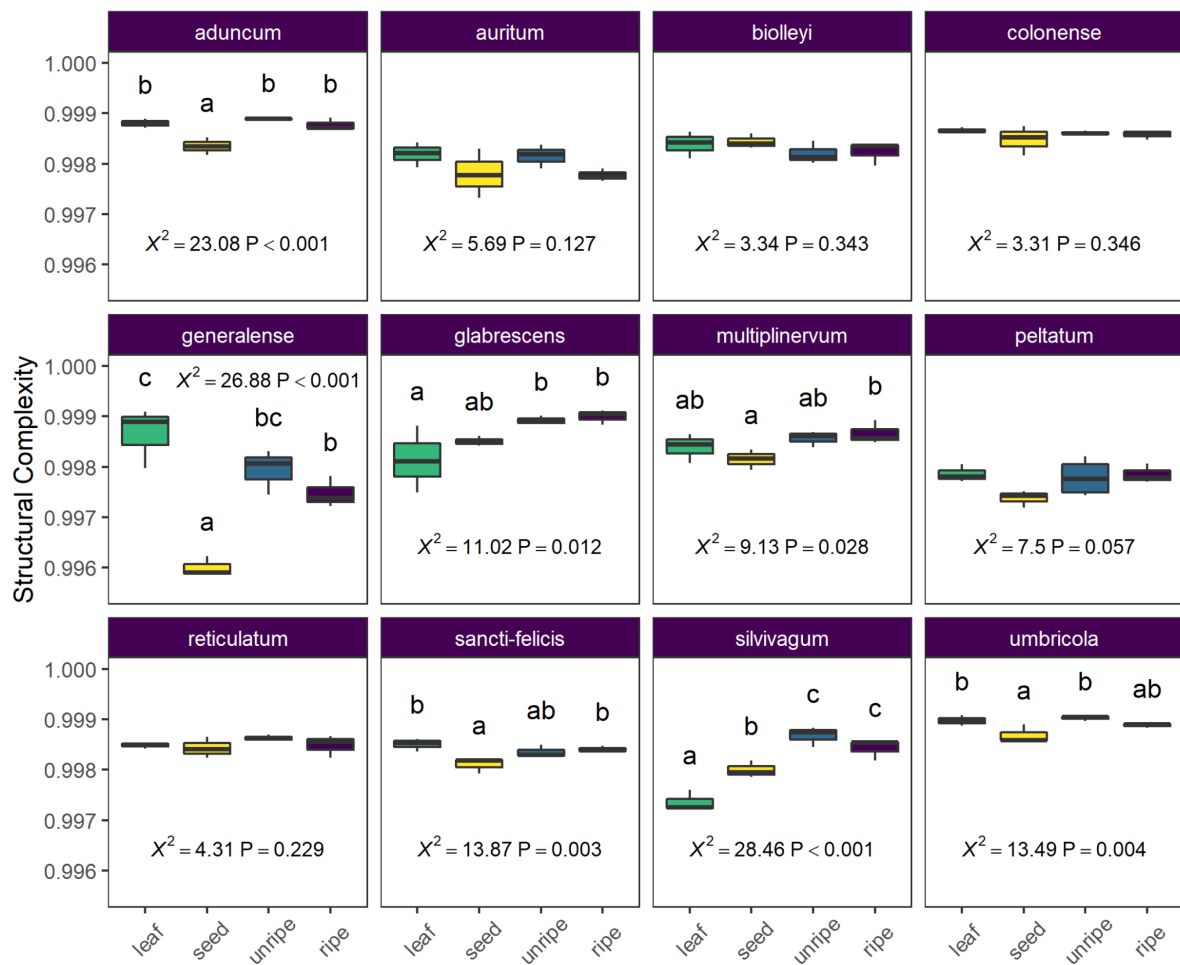

506

507 **Figure 5:** Average structural complexity differs across species and organ type (leaf, seed  
508 unripe pulp, and ripe pulp). Letters above each box plot column indicate results of pairwise  
509 Tukey post-hoc comparisons of organs within each species, with non-shared letters indicating  
510 a significant difference at  $P < 0.05$ . Each species plot includes  $X^2$  and  $P$ -values from species-  
511 level LMMs.

512

### 513 ***Beta diversity***

514 We found that beta-diversity in chemical composition was higher for fruits than  
515 leaves when considering only compound occurrences as well as structural composition. First,  
516 for compound occurrences, there was strong support for overall differences in beta diversity  
517 across organ types ( $F_{3,139} = 7.56$ ,  $P = 0.001$ ), with higher average distances to the group  
518 centroid for seeds, unripe pulp, and ripe pulp relative to leaves (Fig. 6A). Next, for structural  
519 composition, there was also strong support for overall differences in beta diversity across  
520 organ types ( $F_{3,139} = 4.10$ ,  $P = 0.009$ ). In this case, leaves had lower beta diversity than seeds  
521 or ripe pulp, and unripe pulp was intermediate (Fig. 6B). Further analyses conducted  
522 separately for each organ type showed that the differences in beta-diversity among organ  
523 types was due to variation both at the interspecific and intraspecific level (Table 4). A large  
524 proportion of the sample-to-sample variation within organ types (67-86%) was explained by  
525 differences among species relative to that explained by variation within species (14-33%),  
526 and this was especially true for unripe and ripe fruit pulp (Table 4).

527

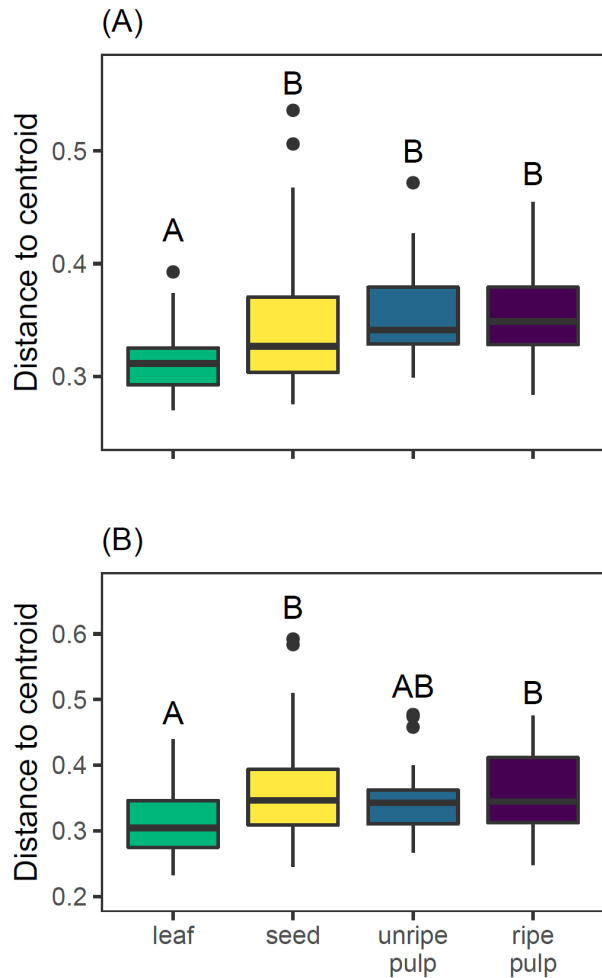

528

529 **Figure 6:** Beta diversity in chemical composition is higher for reproductive organs than  
530 leaves when considering variance in compound occurrences (A) or structural composition  
531 (B). Letters indicate results of pairwise Tukey post-hoc comparisons of organs, with non-  
532 shared letters indicating a significant difference at  $P < 0.05$ .

533

534

535

536

537

538

539



**Table 4:** Results from PERMANOVAs showing a large percentage of sample-to-sample variance in composition within organ types (i.e. beta diversity) is explained by species

|                                            | $F_{11,35}^b$ | $P^b$ | $\eta^2$ (Species) <sup>c</sup> | $\eta^2$ (Residual) <sup>d</sup> |
|--------------------------------------------|---------------|-------|---------------------------------|----------------------------------|
| <b>Compound Occurrences <sup>a</sup></b>   |               |       |                                 |                                  |
| leaf                                       | 6.29          | 0.001 | 0.74                            | 0.26                             |
| seed                                       | 5.17          | 0.001 | 0.70                            | 0.30                             |
| unripe pulp                                | 12.46         | 0.001 | 0.86                            | 0.14                             |
| ripe pulp                                  | 13.18         | 0.001 | 0.86                            | 0.14                             |
| <b>Structural Composition <sup>a</sup></b> |               |       |                                 |                                  |
| leaf                                       | 4.51          | 0.001 | 0.67                            | 0.33                             |
| seed                                       | 6.58          | 0.001 | 0.75                            | 0.25                             |
| unripe pulp                                | 7.90          | 0.001 | 0.79                            | 0.21                             |
| ripe pulp                                  | 10.70         | 0.001 | 0.83                            | 0.17                             |

<sup>a</sup> Separate sets of PERMANOVAs were conducted for each aspect of compound composition: compound occurrences (presence/absence) and structural composition

<sup>b</sup> Statistical results from permutation tests showing strong support for an effect of Piper species on composition

<sup>c</sup> Proportion of sample-to-sample variance explained by species (i.e. interspecific variation)

<sup>d</sup> Proportion of sample-to-sample variance explained by individual and within-individual (residual) variance

540

541

542

543

## 544 Discussion

545 Across the many angiosperms with animal-dispersed seeds, the functional traits of  
546 fruits have been shaped by particularly complex selective pressures, imposed in part by  
547 antagonistic and mutualistic consumers. Plant secondary metabolites are prominent among  
548 the traits that have evolved to mediate plant-consumer interactions. As such, it can be  
549 anticipated that the secondary metabolites of fruits in animal-dispersed plants will reflect the  
550 many facets of their ecological and evolutionary settings -- in their diversity of chemical  
551 composition, molecular structures, and ecological functions. In this study, we surveyed and  
552 compared the compositional and structural diversity of secondary metabolites across  
553 vegetative and reproductive organs in 12 species of the genus *Piper*. In all metrics of  
554 secondary metabolite diversity that were quantified, the overall diversity of fruit organs  
555 matched or exceeded those of leaves, though these patterns varied across species. The  
556 patterns of secondary metabolite diversity that were revealed across vegetative and  
557 reproductive organs are in line with the multifarious functional roles that have been  
558 hypothesized for secondary metabolites in fruits.

559 Our untargeted metabolomic survey of phytochemical occurrence patterns revealed  
560 that fruit organs harbor fruit-specific metabolites from a variety of chemical classes (Table 1,  
561 Fig. 1), in each class equal to or greater in number than those that were leaf-specific (Table  
562 1). This included classes of compounds that have previously been found to be more numerous  
563 and abundant in fruit organs (e.g. amides; Whitehead *et al.*, 2013), as well as numerous  
564 chemical classes previously described in studies of *Piper* spp. leaf chemistry (Parmar *et al.*,  
565 1997; Baldoqui *et al.*, 1999; Kato & Furlan, 2007; Richards *et al.*, 2015). The occurrence of  
566 numerous fruit-specific secondary metabolites from a variety of unlinked biosynthetic  
567 pathways suggests a pattern of fruit-specific secondary metabolite trait evolution, likely a  
568 result of fruit-specific selective pressures.

569 The evolution of organ-specific phytochemical traits across our target plant species is  
570 also made evident by the results of our machine learning analysis. Here, our random forest  
571 model was very successful at distinguishing among organ types based solely on their  
572 secondary metabolite composition. Most notably, the exceptional performance of the  
573 classification algorithm to distinguish between vegetative and reproductive organs can only  
574 be explained by the presence of strong association between chemical composition and organ  
575 type. Despite the fact that our species set included vines, understory shrubs, and pioneering  
576 taxa, all adapted to very different local habitats, these associations are consistent across all 12  
577 focal species.

578           The clustering patterns found by our NMDS analysis (Fig. 2) show clustering at two  
579 different levels. First, the samples from different organs from the same species cluster  
580 together. This pattern strongly suggests the presence of physiological or genetic linkage  
581 constraints in the organ specific evolution of phytochemicals. The strong chemical similarity  
582 across organs within a species could point toward the influence that changes in the expression  
583 or composition of secondary compounds in one plant organ could have on the expression or  
584 composition of other organs. Although our data do not allow us to disentangle the precise  
585 mechanisms that give rise to these patterns, it is clear that chemical changes in one plant  
586 organ are likely to be mirrored, to some extent, by changes in the chemical architecture of the  
587 whole plant. Second, as expected, and despite the strong chemical similarity exhibited by  
588 organs within a *Piper* species, samples also show a clear pattern or clustering by organ type  
589 (Fig. 2). This pattern reinforces the expectation that the distinctive regimes of selective  
590 pressures imposed upon the different plant organs are sufficiently strong to create convergent  
591 organ-specific patterns of the chemical composition, and that these selective regimes are  
592 likely to be consistent across species and habitats. The Boruta variable importance model, a  
593 widely used machine learning algorithm designed to identify statistically important  
594 classification variables from large datasets, revealed specific compounds from at least six  
595 different chemical classes as key features that distinguish vegetative and reproductive organs  
596 (Table S1).

597           While the majority of significant Boruta variables, like the overall majority of  
598 secondary metabolites cataloged in our study, exhibited some overlap in occurrence across  
599 leaf and fruit organs when the 12 *Piper* species were evaluated as a group (Fig. 3A), there  
600 was substantially less overlap at the level of individual species (Fig. S1). In many cases, these  
601 patterns of variance were the result of numerous compounds occurring in only one organ type  
602 in a certain species or subset of species, but occurring more widely in another species or  
603 subset of species.

604

605           The broad overlap across organs in compound occurrence at the genus level provides  
606 a degree of insight into the extent of constraints on organ-specific chemical trait evolution at  
607 this taxonomic scale. However, to a degree this overlap can also be attributed to the shared  
608 demand for defensive compounds across vegetative and reproductive organ types. While  
609 phylogenetic data will be required in order to infer the ancestral organ localizations of  
610 phytochemical traits of *Piper*, the widespread variation in organ localizations that we  
611 observed across species suggests that genetic constraints have not bound these traits to a

612 certain organ type over the course of *Piper* speciation. Further, the apparent mobility of  
613 secondary metabolite traits across organ types within the genus suggests a bidirectional  
614 exchange of these traits, which, when vegetative and reproductive organs are each threatened  
615 by separate assemblages of consumers, may allow more rapid defense trait adaptation than  
616 can arise from novel mutations.

617 Our untargeted metabolomic survey has shown that fruit organs are at the very least a  
618 reservoir of phytochemical richness. While the alpha diversity of organs at the species level  
619 was highly variable (Fig. 4), rarefaction analysis of gamma diversity showed a small but clear  
620 trend towards higher richness of secondary metabolites in reproductive organs (Fig. 3; Table  
621 3). Similarly, while chemical structural complexity of organs at the species level was highly  
622 variable (Fig. 5), chemical structural variance ( $\beta$ -diversity) across species was significantly  
623 higher for reproductive organs than for leaves (Fig. 6). In summary, these trends indicate not  
624 only that reproductive organs accumulate a higher number of secondary metabolite traits than  
625 do leaves, but also that these traits are more divergent from one another across species than  
626 those of leaves. These trends are consistent with higher overall evolutionary diversification of  
627 phytochemical traits in reproductive organs, suggesting that fruits may be an important, but  
628 underappreciated, force in shaping chemical trait evolution at the whole plant level.

629

### 630 **Acknowledgements**

631 This research was supported by National Science Foundation (Grants No. DEB-  
632 1210884 and DEB-1856776 to SRW) and start-up funds to SRW from the Virginia Tech  
633 Department of Biological Sciences. The mass spectrometry resources used in this work were  
634 maintained with funds from the Fralin Life Science Institute as well as the Virginia  
635 Agricultural Experiment Station Hatch Program (VA-160085). We thank the Organization  
636 for Tropical Studies for logistical support at La Selva Biological Station. Marisol Luna  
637 Martinez assisted with sample collection and Orlando Vargas Ramírez assisted with plant  
638 identification. Natalie Rodeman and Katherine Berg assisted with sample processing for  
639 chemical analyses.

640

### 641 **Author contributions**

642 GFS, SRW, and DS designed the research; SRW collected field samples; GFS, SBH,  
643 and RFH conducted chemical analyses, GFS conducted molecular networking and data  
644 curation; GFS and SRW conducted the statistical analysis with contributions from DS; GFS

645 wrote the first draft of the manuscript with contributions from SRW, and all authors  
646 contributed substantially to revisions and approved the final version.

647

#### 648 **Data availability**

649 All data and R scripts will be available through Dryad digital repository upon publication.

650

#### 651 **References**

652 **Adler LS, Seifert MG, Wink M, Morse GE, Turlings T. 2012.** Reliance on pollinators  
653 predicts defensive chemistry across tobacco species. *Ecology Letters* **15**: 1140–1148.

654 **Adler LS, Wink M, Distl M, Lentz AJ. 2006.** Leaf herbivory and nutrients increase nectar  
655 alkaloids. *Ecology Letters* **9**: 960–7.

656 **Aron AT, Gentry EC, McPhail KL, Nothias LF, Nothias-Esposito M, Bouslimani A,**  
657 **Petras D, Gauglitz JM, Sikora N, Vargas F, et al. 2020.** Reproducible molecular  
658 networking of untargeted mass spectrometry data using GNPS. *Nature Protocols* **15**:  
659 1954–1991.

660 **Benton HP, Want EJ, Ebbels TMD. 2010.** Correction of mass calibration gaps in liquid  
661 chromatography-mass spectrometry metabolomics data. *BIOINFORMATICS* **26**: 2488.

662 **Baldoqui DC, Kato MJ, Cavalheiro AJ, Bolzani VDS, Young MCM, Furlan M. 1999.** A  
663 chromene and prenylated benzoic acid from *Piper aduncum*. *Phytochemistry* **51**: 899–902.

664 **Berardi AE, Hildreth SB, Helm RF, Winkel BSJ, Smith SD. 2016.** Evolutionary  
665 correlations in flavonoid production across flowers and leaves in the Iochrominae  
666 (Solanaceae). *Phytochemistry* **130**: 119–127.

667 **Brehm G, Hebert PDN, Colwell RK Adams MO, Bodner F, Friedemann K, Möckel**  
668 **L, Fiedler K. 2016.** Turning up the heat at a hotspot: DNA barcodes reveal 80% more  
669 species of geometrid moths along an Andean elevational gradient. *PlosOne* **11**: e0150327.  
670 doi: 10.1371/journal.pone.0150327

- 671 **Breiman L. 2001.** Random forests. *Machine learning* **45**: 5-32.
- 672 **Breiman L. 2002.** Manual on setting up, using, and understanding random forests v3. 1.  
673 URL: [www.stat.berkeley.edu/~breiman/Using\\_random\\_forests\\_V3.1.pdf](http://www.stat.berkeley.edu/~breiman/Using_random_forests_V3.1.pdf) [accessed 20  
674 January 2021].
- 675 **Cech NB, Enke CG. 2001.** Practical implications of some recent studies in electrospray  
676 ionization fundamentals. *Mass Spectrometry Reviews* **20**: 362–387.
- 677 **Chen H, Köllner TG, Li G, Wei G, Chen X, Zeng D, Qian Q, Chen F. 2020.**  
678 Combinatorial evolution of a terpene synthase gene cluster explains terpene variations in  
679 *Oryza*. *Plant Physiology* **182**: 480–492.
- 680 **Chiarucci A, Bacaro G, Rocchini D, Ricotta C, Palmer M, Scheiner S. 2009.** Spatially  
681 constrained rarefaction: Incorporating the autocorrelated structure of biological  
682 communities into sample-based rarefaction. *Community Ecology* **10**: 209–214.
- 683 **Christian N, Sedio BE, Florez-Buitrago X, Ramírez-Camejo LA, Rojas EI, Mejía LC,**  
684 **Palmedo S, Rose A, Schroeder JW, Herre EA. 2020.** Host affinity of endophytic fungi  
685 and the potential for reciprocal interactions involving host secondary chemistry. *American*  
686 *Journal of Botany* **107**: 219–228.
- 687 **Dyer LA, Palmer ADN. 2004.** *Piper: A model Genus for Studies of Phytochemistry,*  
688 *Ecology, and Evolution.* Kluwer Academic/ Plenum Publishers.
- 689 **Dyer LA, Philbin CS, Ochsenrider KM, Richards LA, Massad TJ, Smilanich AM,**  
690 **Forister ML, Parchman TL, Galland LM, Hurtado PJ, et al. 2018.** Modern approaches  
691 to study plant - insect interactions in chemical ecology. *Nature Reviews Chemistry* **2**: 50–  
692 64.
- 693 **Falara V, Akhtar TA, Nguyen TTH, Spyropoulou EA, Bleeker PM, Schauvinhold I,**  
694 **Matsuba Y, Bonini ME, Schillmiller AL, Last RL, et al. 2011.** The tomato terpene  
695 synthase gene family. *Plant Physiology* **157**: 770–789.

- 696 **Gentry AH. 1990.** *Four neotropical rainforests*. Yale University Press, New Haven.
- 697 **Gotelli NJ, Colwell RK. 2011.** Estimating species richness. In: Magurran AE, McGill BJ,  
698 eds. *Biological Diversity: Frontiers in Measurement and Assessment*. Oxford, UK: Oxford  
699 University Press, 39–54.
- 700 **Greig N. 1993.** Predispersal seed predation on five *Piper* species in tropical rain-forest.  
701 *Oecologia* **93**: 412–420
- 702 **Hartmann T. 2007.** From waste products to ecochemicals: Fifty years research of plant  
703 secondary metabolism. *Phytochemistry* **68**: 2831–2846.
- 704 **Herrera CM. 1982.** Defense of ripe fruit from pests: Its significance in relation to plant-  
705 disperser interactions. *The American Naturalist* **120**: 218–241.
- 706 **Iason GR, Dicke M, Hartley SE. 2012.** *The ecology of plant secondary metabolites: From*  
707 *genes to global processes*. Cambridge, UK: Cambridge University Press.
- 708 **Kato MJ, Furlan M. 2007.** Chemistry and evolution of the Piperaceae. *Pure and Applied*  
709 *Chemistry* **79**: 529–538.
- 710 **Keith RA, Mitchell-Olds T. 2019.** Antagonistic selection and pleiotropy constrain the  
711 evolution of plant chemical defenses. *Evolution* **73**: 947–960.
- 712 **Kessler A, Baldwin IT. 2002.** Plant responses to insect herbivory: The emerging molecular  
713 analysis. *Annual Review of Plant Biology* **53**: 299–328.
- 714 **Kessler A, Halitschke R. 2009.** Testing the potential for conflicting selection on floral  
715 chemical traits by pollinators and herbivores: Predictions and case study. *Functional*  
716 *Ecology* **23**: 901–912.
- 717 **Kuhl C, Tautenhahn R, Boettcher C, Larson TR, Neumann S. 2012.** CAMERA: an  
718 integrated strategy for compound spectra extraction and annotation of liquid  
719 chromatography/mass spectrometry data sets. *Analytical Chemistry*, **84**, 283–289.

- 720 **Kursa MB, Rudnicki WR. 2010.** Feature selection with the Boruta package. *Journal of*  
721 *Statistical Software* **36**: 1-13.
- 722 **Kursar TA, Dexter KG, Lokvam J, Pennington RT, Richardson JE, Weber MG,**  
723 **Murakami ET, Drake C, McGregor R, Coley PD. 2009.** The evolution of antiherbivore  
724 defenses and their contribution to species coexistence in the tropical tree genus *Inga*.  
725 *Proceedings of the National Academy of Sciences of the United States of America* **106**:  
726 18073–18078.
- 727 **Liaw A, Wiener M. 2002.** Classification and regression by randomForest. *R News* **2**: 18-22.
- 728 **Martinez Arbizu P. 2020.** pairwiseAdonis: Pairwise multilevel comparison using adonis. R  
729 package version 0.4. URL <https://github.com/pmartinezarbizu/pairwiseAdonis> . [accessed  
730 9 January 2021].
- 731 **Maynard LD, Slinn HL, Glassmire AE, Matarrita-Carranza B, Dodson CD, Nguyen**  
732 **TT, Burroughs MJ, Dyer LA, Jeffrey CS, Whitehead SR. 2020.** Secondary metabolites  
733 in a neotropical shrub: spatiotemporal allocation and role in fruit defense and dispersal.  
734 *Ecology* **101**: 1–15.
- 735 **Oksanen J, Blanchet FG, Friendly M, Kindt R, Legendre P, McGlenn D, Minchin PR,**  
736 **O'Hara RB, Simpson GL, Solymos P, et al. 2019.** vegan: Community Ecology Package.  
737 R package version 2.5-6. URL <https://CRAN.R-project.org/package=vegan> . [accessed 9  
738 January 2021]
- 739 **Parmar VS, Jain SC, Bisht KS, Jain R, Taneja P, Jha A, Tyagi OD, Prasad AK, Wengel**  
740 **J, Olsen CE, et al. 1997.** Phytochemistry of the genus *Piper*. *Phytochemistry* **46**: 597–  
741 673.
- 742 **Richards LA, Dyer LA, Forister ML, Smilanich AM, Dodson CD, Leonard MD, Jeffrey**  
743 **CS. 2015.** Phytochemical diversity drives plant–insect community diversity. *Proceedings*  
744 *of the National Academy of Sciences of the United States of America* **112**: 10973–10978.



- 745 **Ricigliano VA, Sica VP, Knowles SL, Diette N, Howarth DG, Oberlies NH. 2020.**  
746 Bioactive diterpenoid metabolism and cytotoxic activities of genetically transformed  
747 *Euphorbia lathyris* roots. *Phytochemistry*. doi:10.1016/j.phytochem.2020.112504
- 748 **Salazar D, Jaramillo MA, Marquis RJ. 2016.** Chemical similarity and local community  
749 assembly in the species rich tropical genus *Piper*. *Ecology* **97**: 3176–3183.
- 750 **Salazar D, Lokvam J, Mesones I, Pilco MV, Milagros J, Zuñiga A, Valpine P De, Fine**  
751 **PVA. 2018.** Origin and maintenance of chemical diversity in a species-rich tropical tree  
752 lineage. *Nature Ecology & Evolution* **2**: 983–990.
- 753 **Schneider GF, Coley PD, Younkin GC, Forrister DL, Mills AG, Kursar TA. 2019.**  
754 Phenolics lie at the centre of functional versatility in the responses of two phytochemically  
755 diverse tropical trees to canopy thinning. *Journal of Experimental Botany* **70**: 5853–5864.
- 756 **Sedio BE, Echeverri JCR, Boya CA, Wright SJ. 2017.** Sources of variation in foliar  
757 secondary chemistry in a tropical forest tree community. *Ecology* **98**: 616–623.
- 758 **Smith CA, Want EJ, O'Maille G, Abagyan R, Siuzdak G. 2006.** XCMS: Processing mass  
759 spectrometry data for metabolite profiling using nonlinear peak alignment, matching and  
760 identification. *Analytical Chemistry* **78**: 779–787.
- 761 **Suzuki T, Iwai K. 1984.** Constituents of red pepper species: Chemistry, biochemistry,  
762 pharmacology, and food science of the pungent principle of *Capsicum* species. In: Brossi  
763 A, ed. *The Alkaloids, Volume 23*. Academic Press, 227–299.
- 764 **Tautenhahn R, Boettcher C, Neumann S. 2008.** Highly sensitive feature detection for high  
765 resolution LC/MS. *BMC Bioinformatics*. doi: 10.1186/1471-2105-9-504.
- 766 **Tewksbury JJ. 2002.** Fruits, frugivores and the evolutionary arms race. *New Phytologist*  
767 **156**: 137–139.
- 768 **Tewksbury JJ, Nabhan GP. 2001.** Seed dispersal: Directed deterrence by capsaicin in  
769 chillies. *Nature* **412**: 403–404.

- 770 **Tewksbury JJ, Reagan KM, Machnicki NJ, Carlo TA, Haak DC, Peñaloza ALC, Levey**  
771 **DJ. 2008.** Evolutionary ecology of pungency in wild chilies. *Proceedings of the National*  
772 *Academy of Sciences of the United States of America* **105**: 11808–11811.
- 773 **Thies W, Kalko EKV. 2004.** Phenology of Neotropical pepper plants (Piperaceae) and their  
774 association with their main dispersers, two short-tailed fruit bats, *Carollia perspicillata*  
775 and *C. castanea* (Phyllostomidae). *Oikos* **104**: 362–376.
- 776 **Volf M, Segar ST, Miller SE, Isua B, Sisol M, Aubona G, Šimek P, Moos M, Laitila J,**  
777 **Kim J, et al. 2018.** Community structure of insect herbivores is driven by conservatism,  
778 escalation and divergence of defensive traits in *Ficus*. *Ecology Letters* **21**: 83–92.
- 779 **Wang M, Carver JJ, Phelan V V, Sanchez LM, Garg N, Peng Y, Nguyen DD, Watrous**  
780 **J, Kapon CA, Luzzatto-Knaan T, et al. 2016.** Sharing and community curation of mass  
781 spectrometry data with Global Natural Products Social Molecular Networking. *Nature*  
782 *Biotechnology* **34**: 828–837.
- 783 **Wetzel WC, Whitehead SR. 2020.** The many dimensions of phytochemical diversity:  
784 linking theory to practice. *Ecology Letters* **23**: 16–32.
- 785 **Whitehead SR, Bowers MD. 2013a.** Iridoid and secoiridoid glycosides in a hybrid complex  
786 of bush honeysuckles (*Lonicera* spp., Caprifoliaceae): Implications for evolutionary  
787 ecology and invasion biology. *Phytochemistry* **86**:57–63.
- 788 **Whitehead SR, Bowers MD. 2013b.** Evidence for the adaptive significance of secondary  
789 compounds in vertebrate-dispersed fruits. *The American Naturalist* **182**: 563–577.
- 790 **Whitehead SR, Bowers MD. 2014.** Chemical ecology of fruit defence: synergistic and  
791 antagonistic interactions among amides from *Piper*. *Functional Ecology* **28**: 1094–1106.
- 792 **Whitehead SR, Jeffrey CS, Leonard MD, Dodson CD, Dyer LA, Bowers MD. 2013.**  
793 Patterns of secondary metabolite allocation to fruits and seeds in *Piper reticulatum*.  
794 *Journal of Chemical Ecology* **39**: 1373–1384.

- 795 **Whitehead SR, Quesada MFO, Bowers MD. 2016.** Chemical tradeoffs in seed dispersal:  
796 defensive metabolites in fruits deter consumption by mutualist bats. *Oikos* **125**: 927–937.
- 797 **Wittstock U, Gershenzon J. 2002.** Constitutive plant toxins and their role in defense against  
798 herbivores and pathogens. *Current Opinion in Plant Biology* **5**: 300–307.
- 799 **Xu S, Kreitzer C, McGale E, Lackus ND, Guo H, Köllner TG, Schuman MC, Baldwin**  
800 **IT, Zhou W. 2020.** Allelic differences of clustered terpene synthases contribute to  
801 correlated intraspecific variation of floral and herbivory-induced volatiles in a wild  
802 tobacco. *New Phytologist*. doi: 10.1111/nph.16739
